# Supplementary material for: The effect of epoxy–silicone copolymer content on the thermal and mechanical properties of cured epoxy resin modified with siloxane
Source: Royal Society of Chemistry journal article supplement (doi:10.1039/c4ra09230a), 2014-01-01
Supplement: c4ra09230a1.pdf [file c4ra09230a1.pdf]

**Table 1. PSG produced from DGEBA modified with Z-6018**

| Sample code | E-51 | PSG1 | PSG2 | PSG3 | PSG4 |
|-------------|------|------|------|------|------|
| Z-6018 (g)  | 0    | 10   | 20   | 30   | 40   |
| DGEBA (g)   | 80   | 70   | 60   | 50   | 40   |
