# Supplementary material for: The effect of epoxy–silicone copolymer content on the thermal and mechanical properties of cured epoxy resin modified with siloxane
Source: Royal Society of Chemistry journal article supplement (doi:10.1039/c4ra09230a), 2014-01-01
Supplement: c4ra09230a2.pdf [file c4ra09230a2.pdf]

**Table 2. The compositions of epoxy resins<sup>(a)</sup> modified with SH023 and Z-6018**

| Sample code | E-51 (g) | Z-6018 (g) | SH023 (g) | DER732 (g) | EC-301(g) |
|-------------|----------|------------|-----------|------------|-----------|
| EG          | 80.00    | 0          | 0         | 20.00      | 30.38     |
| PSDG1       | 70.00    | 10.00      | 0         | 20.00      | 24.52     |
| PSDG2       | 60.00    | 20.00      | 0         | 20.00      | 23.16     |
| PSDG3       | 50.00    | 30.00      | 0         | 20.00      | 20.08     |
| PSDG4       | 40.00    | 40.00      | 0         | 20.00      | 16.12     |
| PSHG1       | 70.00    | 0          | 10.00     | 20.00      | 27.38     |
| PSHG2       | 60.00    | 0          | 20.00     | 20.00      | 24.39     |
| PSHG3       | 50.00    | 0          | 30.00     | 20.00      | 21.40     |
| PSHG4       | 40.00    | 0          | 40.00     | 20.00      | 18.40     |

a. The total weight of the modified epoxy resins is 100 percent except curing agent.
