# Supplementary material for: The effect of epoxy–silicone copolymer content on the thermal and mechanical properties of cured epoxy resin modified with siloxane
Source: Royal Society of Chemistry journal article supplement (doi:10.1039/c4ra09230a), 2014-01-01
Supplement: c4ra09230a3.pdf [file c4ra09230a3.pdf]

**Table 3. EEW Values of EP and PSG systems**

| Sample code                        | E-51                 | PSG1             | PSG2             | PSG3             | PSG4             |
|------------------------------------|----------------------|------------------|------------------|------------------|------------------|
| EEW (calculate value) (g/mol)      | 185-192 <sup>a</sup> | 212 <sup>b</sup> | 247 <sup>b</sup> | 296 <sup>b</sup> | 370 <sup>b</sup> |
| EEW (experimental value) (g/mol)   | 185                  | 238              | 255              | 304              | 378              |
| The rate of opening epoxy ring (%) | 0%                   | 11%              | 3%               | 2.6%             | 2%               |

a. The EEW of E-51 is given by the product introduction of DGEBA.

b. The EEW of PSG1, PSG2, PSG3, PSG4 is calculated based on the epoxy equivalent weight and the weight ratios of DGEBA.
