# Supplementary material for: The effect of epoxy–silicone copolymer content on the thermal and mechanical properties of cured epoxy resin modified with siloxane
Source: Royal Society of Chemistry journal article supplement (doi:10.1039/c4ra09230a), 2014-01-01
Supplement: c4ra09230a4.pdf [file c4ra09230a4.pdf]

**Table 4. Thermal stability factors of the cured PSHG systems and PSDG systems**

| Sample code | T <sub>-5%</sub> (°C) | T <sub>max1</sub> (°C) | T <sub>max2</sub> (°C) | Solid residue at 600 °C (%) |
|-------------|-----------------------|------------------------|------------------------|-----------------------------|
| EG          | 332.07                | 347.04                 | 377.02                 | 4.47                        |
| PSHG2       | 329.31                | 346.85                 | 361.99                 | 8.64                        |
| PSHG4       | 316.87                | /                      | 351.33                 | 13.17                       |
| PSDG2       | 328.88                | /                      | 344.89                 | 18.44                       |
| PSDG4       | 323.16                | /                      | 351.29                 | 33.54                       |
